# Supplementary material for: Upcycling of plastic waste into carbon nanotubes as efficient battery additives
Source: Royal Society of Chemistry journal article supplement (doi:10.1039/d3gc02100a), 2023-01-01
Supplement: d3gc02100a1.pdf [file d3gc02100a1.pdf]

## Electronic Supplementary Information

### Upcycling of plastic waste into carbon nanotubes as efficient battery additives

Eonu Nam,<sup>‡a</sup> Gyori Park,<sup>‡b</sup> Ji Young Nam,<sup>c</sup> Sooryun Park,<sup>d</sup> Yoonjeong Jo,<sup>a</sup> Jihun Kim,<sup>a</sup>  
Byung Gwan Park,<sup>a</sup> Kyungeun Baek,<sup>a</sup> Seok Ju Kang,<sup>a</sup> Ho Won Ra,<sup>c</sup> Youngsoo Park,<sup>d</sup>  
Myung Won Seo,<sup>\*e</sup> Kyung Jin Lee<sup>\*b</sup>, and Kwangjin An<sup>\*a</sup>

<sup>a</sup>School of Energy and Chemical Engineering, and Graduate School of Carbon Neutrality, Ulsan National Institute of Science and Technology (UNIST), Ulsan 44919, Republic of Korea.

<sup>b</sup>Department of Chemical Engineering and Applied Chemistry, Chungnam National University, Daejeon 34134, Republic of Korea.

<sup>c</sup>Climate Change Research Division, Korea Institute of Energy Research (KIER), Daejeon 34129, Republic of Korea

<sup>d</sup>Korea Carbon Industry Promotion Agency, Jeonju 54853, Republic of Korea

<sup>e</sup>School of Environmental Engineering, University of Seoul, Seoul 02504, Republic of Korea.

<sup>‡</sup>These authors contributed equally to this work.

<sup>\*</sup>To whom correspondence should be addressed (E-mail: [kjan@unist.ac.kr](mailto:kjan@unist.ac.kr))

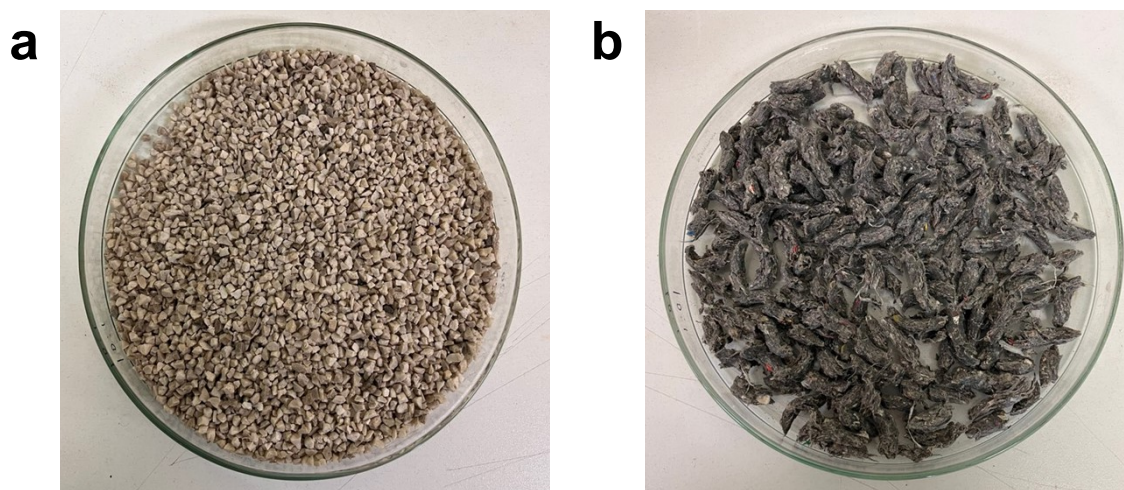

**Fig. S1.** Photographs of (a) masks and (b) SRF pellets used in pyrolysis.

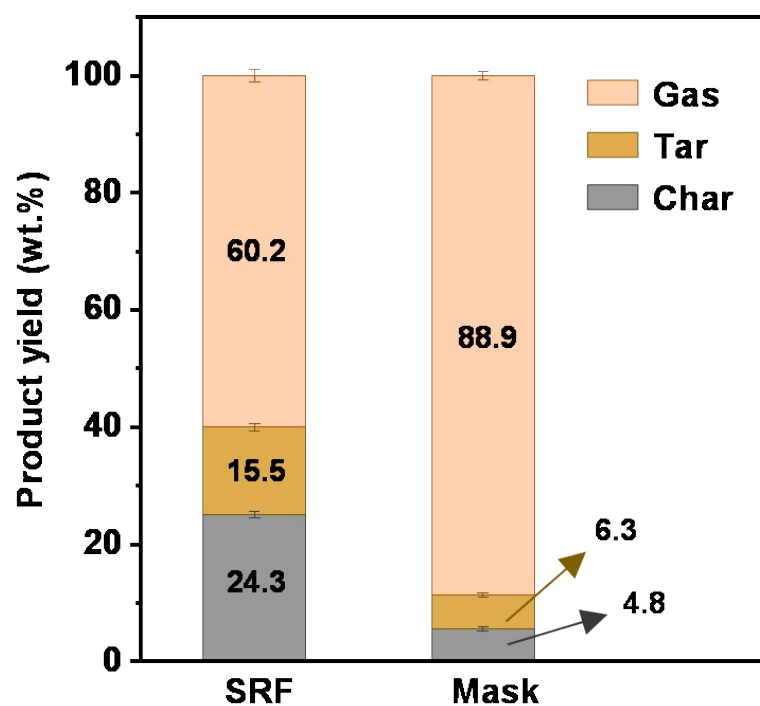

**Fig. S2.** Product yields of SRF and mask waste after pyrolysis at 800 °C.

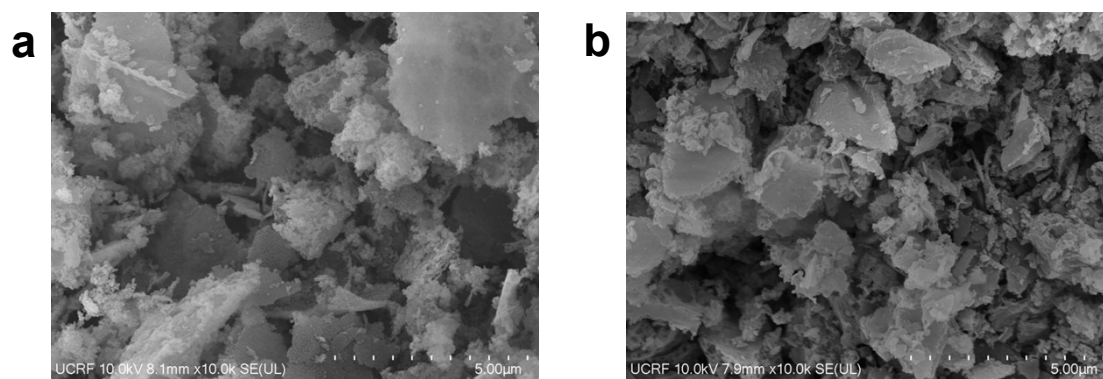

**Fig. S3.** SEM images of the as-prepared (a) CoMo/MgO and (b) FeMo/MgO catalysts.

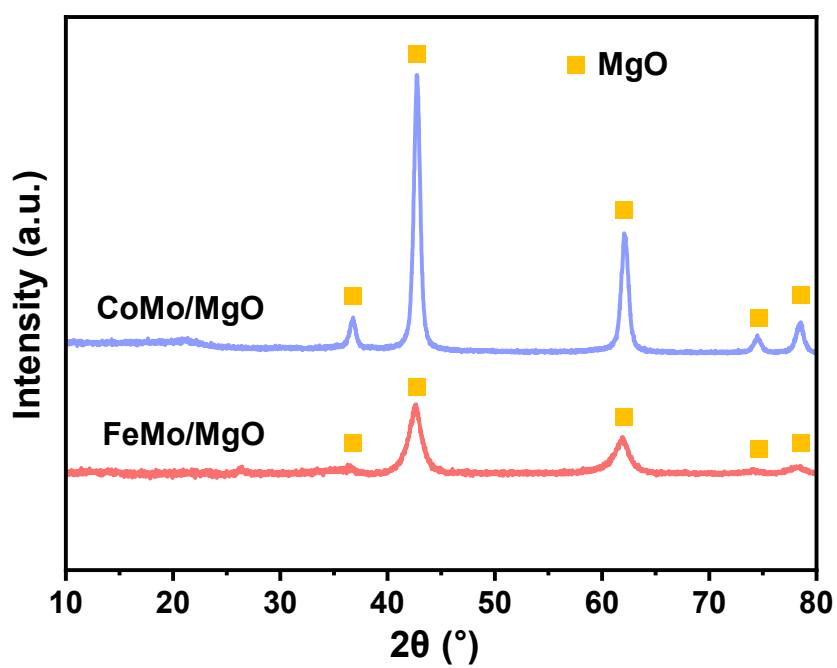

**Fig. S4.** XRD patterns of the as-prepared CoMo/MgO and FeMo/MgO catalysts.

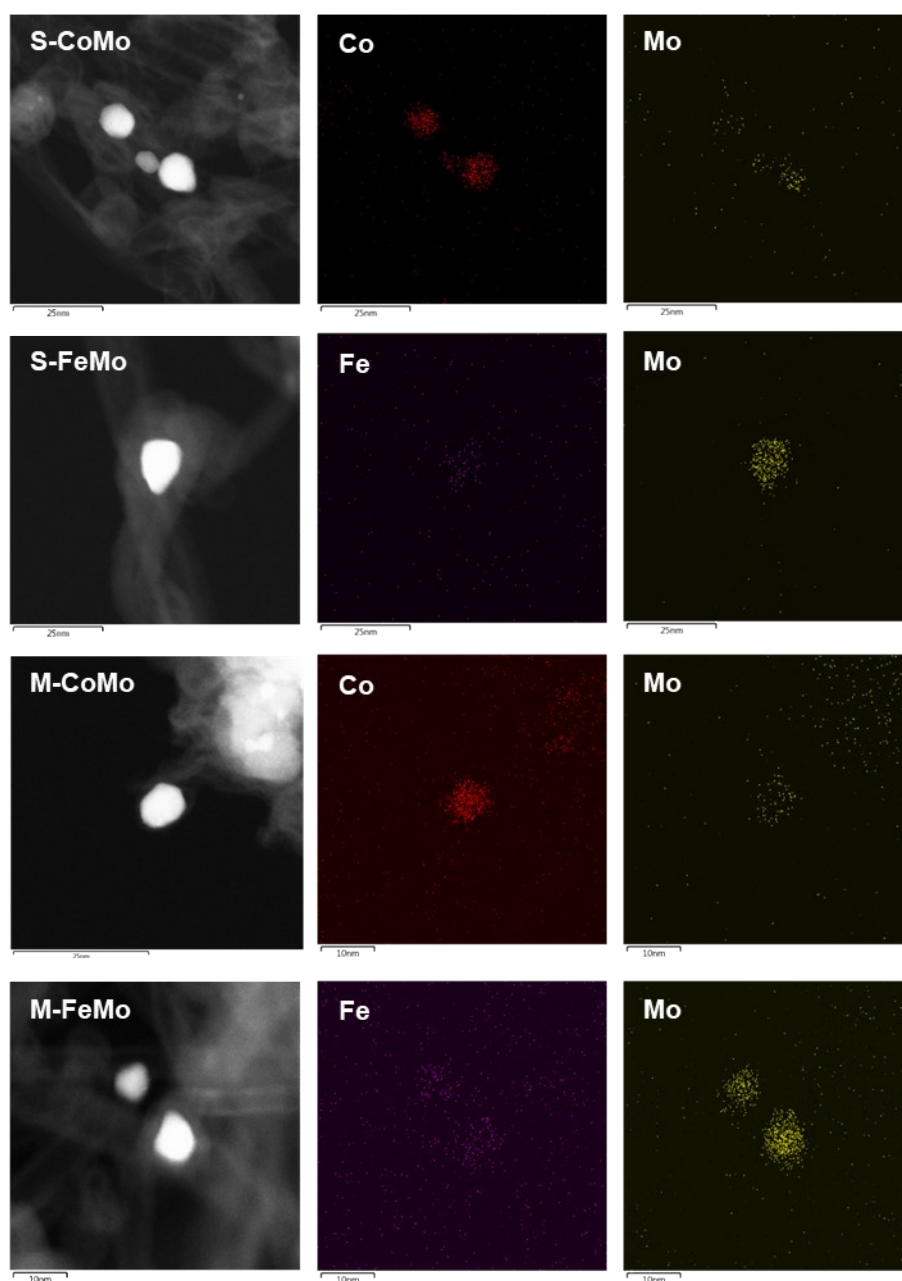

**Fig. S5.** HAADF-STEM and EDS mapping images of the spent catalysts (S-CoMo, S-FeMo, M-CoMo, and M-FeMo) after CVD.

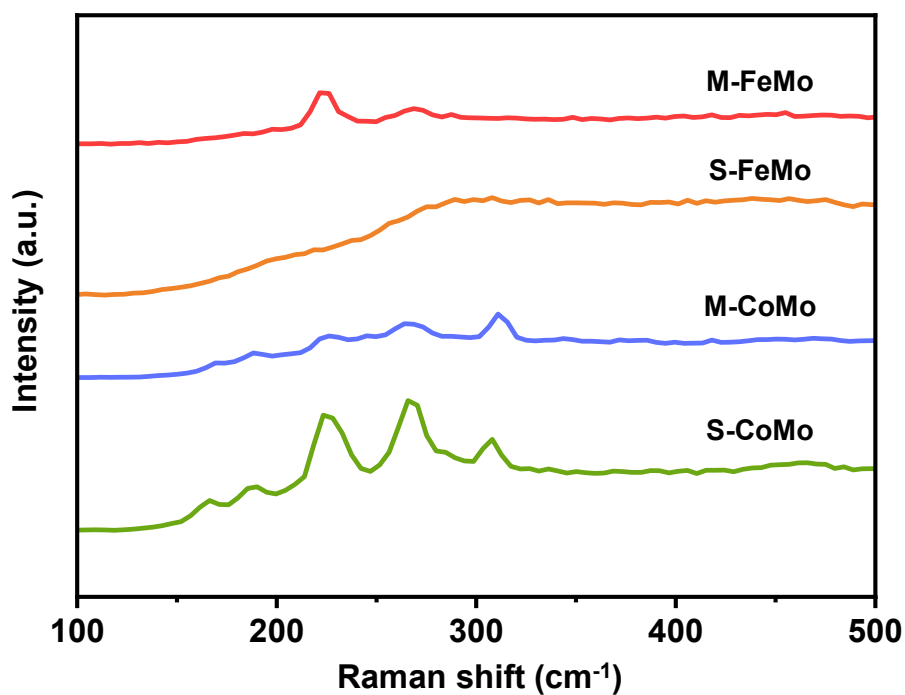

**Fig. S6.** Low-frequency Raman spectra of the plastic-derived CNTs on the spent catalysts.

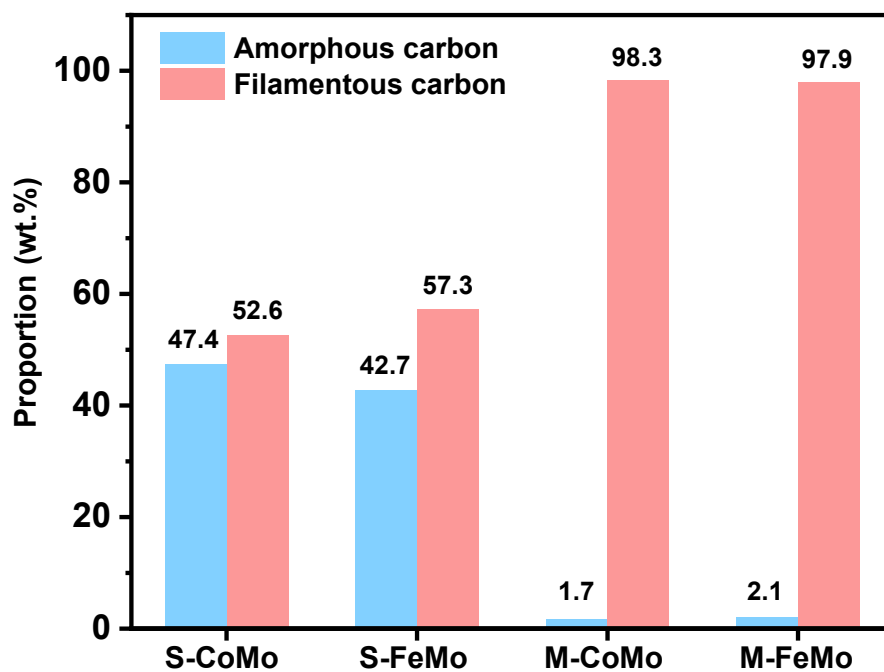

**Fig. S7.** Mass ratios of amorphous carbon and filamentous carbon in the spent catalysts calculated using the TPO and derivative TPO profiles.

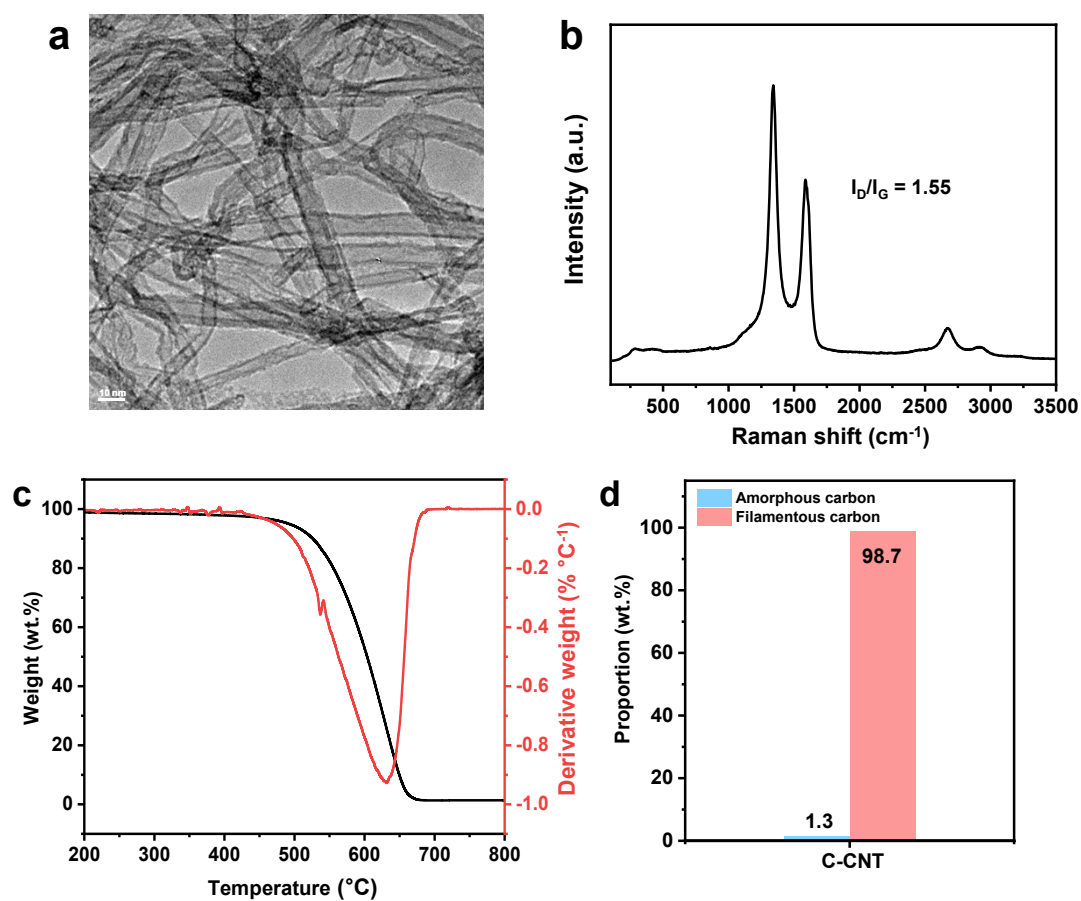

**Fig. S8.** (a) TEM image, (b) Raman spectrum, (c) TPO and derivative TPO profiles, and (d) mass ratios of the amorphous and filamentous carbon in commercial CNTs (C-CNTs).

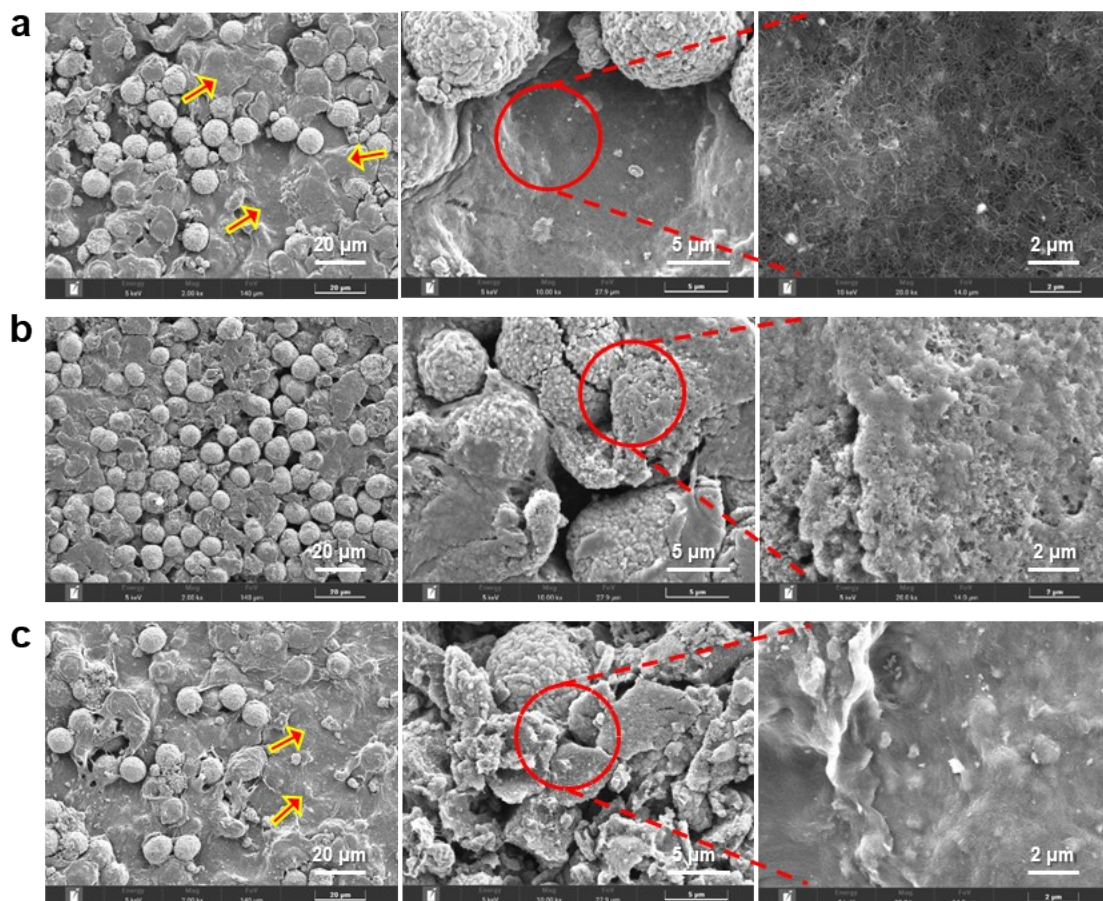

**Fig. S9.** SEM images of the electrode surfaces with the different types of CNTs: (a) C-CNT, (b) FeMo-CNT, and (c) CoMo-CNT.

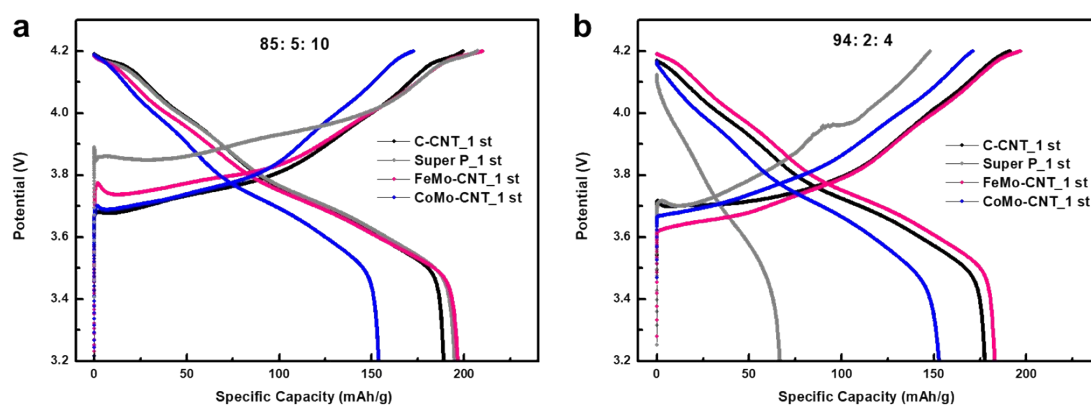

**Fig. S10.** First discharge-charge profiles at 0.1 C of each electrode at ratios of (a) 85 : 5 : 10 and (b) 94 : 2 : 4.

**Table S1.** Results of the ultimate and proximate analyses of masks and SRF (dry basis).

| Feedstock | Ultimate analysis (wt.%) |       |                |      |     |      | Proximate analysis (wt.%) |          |      |              |
|-----------|--------------------------|-------|----------------|------|-----|------|---------------------------|----------|------|--------------|
|           | C                        | H     | O <sup>a</sup> | N    | S   | Cl   | Volatiles                 | Moisture | Ash  | Fixed carbon |
| Masks     | 79.1–                    | 12.2– | 5.8–           | 0.5– | 0   | 0    | 87.2–                     | 0.3–     | 0.5– | 10.4–        |
|           | 80.7                     | 12.4  | 7.3            | 0.7  |     |      | 88.8                      | 0.5      | 0.8  | 11.0         |
| SRF       | 57.9–                    | 7.3–  | 21.5–          | 0.2– | 0–  | 0.3– | 81.0–                     | 4.1–     | 8.6– | 3.7–         |
|           | 61.4                     | 8.0   | 24.8           | 0.3  | 0.1 | 0.5  | 84.3                      | 4.6      | 9.2  | 4.0          |

<sup>a</sup>Calculated as  $[O] = 100\% - \{[C] + [H] + [N] + [S] + [\text{ash}]\}$ .

**Table S2.** Composition of gas (vol.%) obtained by pyrolysis of the mask waste and SRF.

| Components                                         | Mask gas    | SRF gas     |
|----------------------------------------------------|-------------|-------------|
| CH <sub>4</sub>                                    | 4.62–4.63   | 1.76–1.79   |
| C <sub>2</sub> H <sub>4</sub>                      | 4.04–4.07   | 1.47–1.51   |
| C <sub>2</sub> H <sub>2</sub>                      | 0.09–0.10   | 0.08        |
| C <sub>2</sub> H <sub>6</sub>                      | 0.33–0.35   | 0.11        |
| C <sub>3</sub> H <sub>6</sub> (Propylene)          | 0.84–0.89   | 0.20–0.22   |
| C <sub>3</sub> H <sub>8</sub>                      | 0.02        | -           |
| C <sub>3</sub> H <sub>4</sub> (Propadiene)         | 0.03        | 0.01        |
| C <sub>3</sub> H <sub>4</sub> (Propyne)            | 0.05        | 0.01        |
| i-C <sub>4</sub> H <sub>8</sub>                    | 0.12        | 0.02        |
| C <sub>4</sub> H <sub>8</sub> (1-Butene)           | 0.21        | 0.06        |
| C <sub>4</sub> H <sub>8</sub> (trans-2-butene)     | 0.01        | -           |
| C <sub>5</sub> H <sub>10</sub> (1-pentene)         | 0.08–0.09   | 0.02        |
| C <sub>5</sub> H <sub>10</sub> (2-methyl-2-butene) | 0.03–0.04   | 0.01        |
| H <sub>2</sub>                                     | 2.28–2.29   | 1.31–1.56   |
| CO                                                 | 0.96–0.97   | 1.68–1.73   |
| CO <sub>2</sub>                                    | 0.52        | 1.12–1.14   |
| N <sub>2</sub>                                     | 85.65–85.73 | 91.83–92.11 |

**Table S3.** Results of elemental analysis using SEM-EDS, surface area, and pore volumes of the as-prepared CoMo/MgO and FeMo/MgO catalysts.

| Catalyst | SEM-EDS   |           |           | $S_{\text{BET}}$ ( $\text{m}^2 \text{g}^{-1}$ ) | Pore volume ( $\text{cm}^3 \text{g}^{-1}$ ) |
|----------|-----------|-----------|-----------|-------------------------------------------------|---------------------------------------------|
|          | Co (wt.%) | Fe (wt.%) | Mo (wt.%) |                                                 |                                             |
| CoMo/MgO | 8.8       | -         | 2.9       | 37.9                                            | 0.351                                       |
| FeMo/MgO | -         | 2.7       | 21.1      | 27.1                                            | 0.209                                       |

**Table S4.** Effect of catalysts on the composition of pyrolysis gas (vol.%) generated from masks (denoted as “Mask” or “M-”) and SRF (denoted as “SRF” or “S”) on  $\text{N}_2$ -free basis. After CVD was conducted, the type of catalyst (CoMo or FeMo) is given after the hyphen.

| Components                                    | Mask        | M-CoMo      | M-FeMo      | SRF         | S-CoMo      | S-FeMo      |
|-----------------------------------------------|-------------|-------------|-------------|-------------|-------------|-------------|
| $\text{CH}_4$                                 | 32.28–32.36 | 32.82–33.10 | 17.17–17.47 | 21.58–22.25 | 21.66–22.06 | 17.21–18.10 |
| $\text{C}_2\text{H}_4$                        | 28.34–28.38 | 8.14–8.20   | 0.50–0.54   | 18.03–18.83 | 7.92–8.07   | 3.95–4.13   |
| $\text{C}_2\text{H}_2$                        | 0.61–0.67   | 1.40–1.42   | 0.01–0.02   | 0.92–0.98   | 1.49–1.50   | 0.09–0.12   |
| $\text{C}_2\text{H}_6$                        | 2.29–2.31   | 0.24–0.26   | 0.06–0.07   | 1.35–1.41   | 0.08–0.10   | 0.07–0.08   |
| $\text{C}_3\text{H}_6$ (Propylene)            | 6.04–6.08   | 0.07–0.08   | -           | 2.52–2.63   | 0.05        | 0.02        |
| $\text{C}_3\text{H}_8$                        | 0.13–0.14   | -           | -           | 0.05–0.06   | -           | -           |
| $\text{C}_3\text{H}_4$ (Propadiene)           | 0.20        | 0.01        | -           | 0.08–0.09   | 0.01        | -           |
| $\text{C}_3\text{H}_4$ (Propyne)              | 0.35–0.37   | 0.02        | -           | 0.15–0.16   | 0.01–0.02   | -           |
| i- $\text{C}_4\text{H}_8$                     | 0.79–0.82   | -           | -           | 0.19–0.20   | -           | -           |
| $\text{C}_4\text{H}_8$ (1-Butene)             | 1.44–1.46   | 0.08–0.09   | -           | 0.77–0.81   | 0.07–0.08   | 0.02–0.03   |
| $\text{C}_4\text{H}_8$ (trans-2-Butene)       | 0.03–0.04   | -           | -           | 0.02        | -           | -           |
| $\text{C}_5\text{H}_{10}$ (1-Pentene)         | 0.58–0.61   | 0.01–0.02   | -           | 0.27–0.29   | -           | -           |
| $\text{C}_5\text{H}_{10}$ (2-Methyl-2-butene) | 0.23–0.25   | -           | -           | 0.08–0.09   | -           | -           |
| $\text{H}_2$                                  | 15.93–16.04 | 45.50–46.52 | 69.83–70.31 | 16.56–19.06 | 35.58–36.81 | 40.63–42.53 |
| CO                                            | 6.70–6.73   | 7.96–7.99   | 11.09–11.26 | 20.97–21.48 | 23.78–25.52 | 34.26–35.08 |
| $\text{CO}_2$                                 | 3.61–3.68   | 2.70–3.33   | 0.79–0.87   | 13.92–14.24 | 7.51–7.55   | 1.84–1.85   |

**Table S5.** Characteristics of the mask-derived and commercial CNTs and commercial carbon black.

| Sample   | Average diameter<br>(nm) | $I_D/I_G$ ratio | CNT purity<br>(%) | Surface area<br>( $m^2 g^{-1}$ ) |
|----------|--------------------------|-----------------|-------------------|----------------------------------|
| FeMo-CNT | 5.4                      | 0.28            | 97.9              | 271.0                            |
| CoMo-CNT | 3.5                      | 0.27            | 98.3              | 207.4                            |
| C-CNT    | 6.1                      | 1.55            | 98.7              | 246.8                            |
| Super P  | -                        | -               | -                 | 63.3                             |

<sup>a</sup> $I_D$  represents the intensity of the D-band in the Raman spectrum.

<sup>b</sup> $I_G$  represents the intensity of the G-band in the Raman spectrum.

**Table S6.** First discharge-charge capacity and initial coulombic efficiency (ICE) of the 85 : 5 : 10 electrodes with different carbon materials.

|          | First charge capacity<br>( $mAh g^{-1}$ ) | First discharge capacity<br>( $mAh g^{-1}$ ) | ICE<br>(%) |
|----------|-------------------------------------------|----------------------------------------------|------------|
| C-CNT    | 199.7                                     | 189.6                                        | 94.9       |
| Super P  | 207.3                                     | 195.7                                        | 94.4       |
| FeMo-CNT | 210.2                                     | 197.6                                        | 94.0       |
| CoMo-CNT | 172.8                                     | 154.5                                        | 89.4       |

**Table S7.** First discharge-charge capacity and ICE of the 94 : 2 : 4 electrodes with different carbon materials.

|          | First charge capacity<br>( $mAh g^{-1}$ ) | First discharge capacity<br>( $mAh g^{-1}$ ) | ICE<br>(%) |
|----------|-------------------------------------------|----------------------------------------------|------------|
| C-CNT    | 191.4                                     | 178.8                                        | 93.4       |
| Super P  | 148.0                                     | 67.5                                         | 45.6       |
| FeMo-CNT | 196.9                                     | 184.2                                        | 93.6       |
| CoMo-CNT | 171.2                                     | 153.9                                        | 89.9       |
